# Supplementary material for: Anti-inflammatory terpenoids from Boswellia ovalifoliolata
Source: Royal Society of Chemistry journal article supplement (doi:10.1039/c3ra46412a), 2013-12-03

## *Supporting Information*

### **Anti-inflammatory terpenoids from *Boswellia ovalifoliolata***

Renu Chib,<sup>a</sup> Manjeet Kumar,<sup>a</sup> Masood Rizvi,<sup>b</sup> Simmi Sharma,<sup>a</sup> Anjali Pandey,<sup>a</sup> Sarang Bani,<sup>a</sup>  
Samar S. Andotra,<sup>a</sup> Subash C. Taneja,<sup>a</sup> Bhahwal A. Shah<sup>\*,a</sup>

<sup>a</sup>*Natural Product Microbes, CSIR-Indian Institute of Integrative Medicine, Canal Road, Jammu-Tawi, 180001.*

<sup>b</sup>*Department of Chemistry, University of Kashmir, Hazaratbal, J&K, India.*

*E-mail:* [bashah@iiim.ac.in](mailto:bashah@iiim.ac.in)

Tel.: +91-191-25692217. Fax: +91-191-25693331.

**Cell lines, growth medium and treatment conditions.** Human cancer cell line i.e., Leukemia (THP-1), Lung (A-549) and Colon (COLO-205) were procured from European Collection of cell culture (ECACC), UK. Cells were grown in RPMI-1640 medium supplemented with 10 % FCS and 1 % penicillin. Penicillin was dissolved in PBS and sterilized by filtering through 0.2µm filter in laminar air flow hood. Cells were cultured in CO<sub>2</sub> incubator (New Brunswick, Galaxy 170R, Eppendroff) with an internal atmosphere of 95 % air and 5 % CO<sub>2</sub> gas and the cell lines were maintained at 37<sup>0</sup>C. The media was stored at low temperature (2-8°C). The medium for cryopreservation contained 20% FCS and 10% DMSO in growth medium.

**Cell Cytotoxicity assay.** SRB assay was performed in which cell suspension of optimum cell density was seeded and exposed to 1, 10 and 100 µM concentrations of **2** and **5** in the culture medium. The cells were incubated with test samples for 48 h. Then the cells were fixed by adding trichloroacetic acid for 1 h at 4 °C. After 1 h the plates were washed five times with distilled water and allowed to dry in air. This was followed by the addition of 100 µL of 0.4% sulphorhodamine (SRB) dye for 0.5 h at room temperature. Plates were then washed with 1% v/v acetic acid to remove the unbound SRB. The bound dye was solublized by adding 100 µL of 10 mM Tris buffer (pH = 10.05) to each well. The plates were put on the shaker platform for 5 min to solublize the dye completely, and finally the reading was taken at 540 nm (Houghton et al., *Method*, 2007, **42**, 377-387).

**Table 1. *In vitro* Cytotoxicity of compound 2 and 5 against human cancer cell lines**

| Cell line Type |                    | LEUKEMIA            | LUNG  | COLON    |
|----------------|--------------------|---------------------|-------|----------|
|                |                    | THP-1               | A-549 | COLO-205 |
| Compound       | Conc. (µM)         | % GROWTH INHIBITION |       |          |
| <b>2</b>       | 1                  | 1                   | 5     | 0        |
|                | 10                 | 9                   | 12    | 5        |
|                | 100                | 77                  | 81    | 11       |
| <b>5</b>       | 1                  | 0                   | 3     | 0        |
|                | 10                 | 1                   | 10    | 0        |
|                | 100                | 9                   | 67    | 6        |
| Mytomycin-C    | 1×10 <sup>-6</sup> | 37                  | 56    | 34       |
| 5-FU           | 1×10 <sup>-5</sup> | 24                  | 12    | 69       |

**Table 2. List of known compounds and their references**

| <b>Entry</b> | <b>Compound no. in manuscript</b> | <b>Reference</b>                                                                          |
|--------------|-----------------------------------|-------------------------------------------------------------------------------------------|
| 1            | <b>4</b>                          | <i>J. Chin. Pharm. Sci.</i> , <b>2008</b> , 144-147.                                      |
| 2            | <b>5,6,7</b>                      | <i>Indian J. Chem., Sect. B</i> , <b>1978</b> , 176.                                      |
| 3            | <b>8</b>                          | <i>Agric. Biol. Chem.</i> , <b>1961</b> , 517-518.                                        |
| 4            | <b>9</b>                          | <i>Nat. Prod. Rep.</i> , <b>2009</b> , 72–89.                                             |
| 5            | <b>10</b>                         | a) <i>Phytochemistry</i> , <b>1969</b> , 669. b) <i>Phytochemistry</i> <b>1995</b> , 453. |

Spectral Graphs:

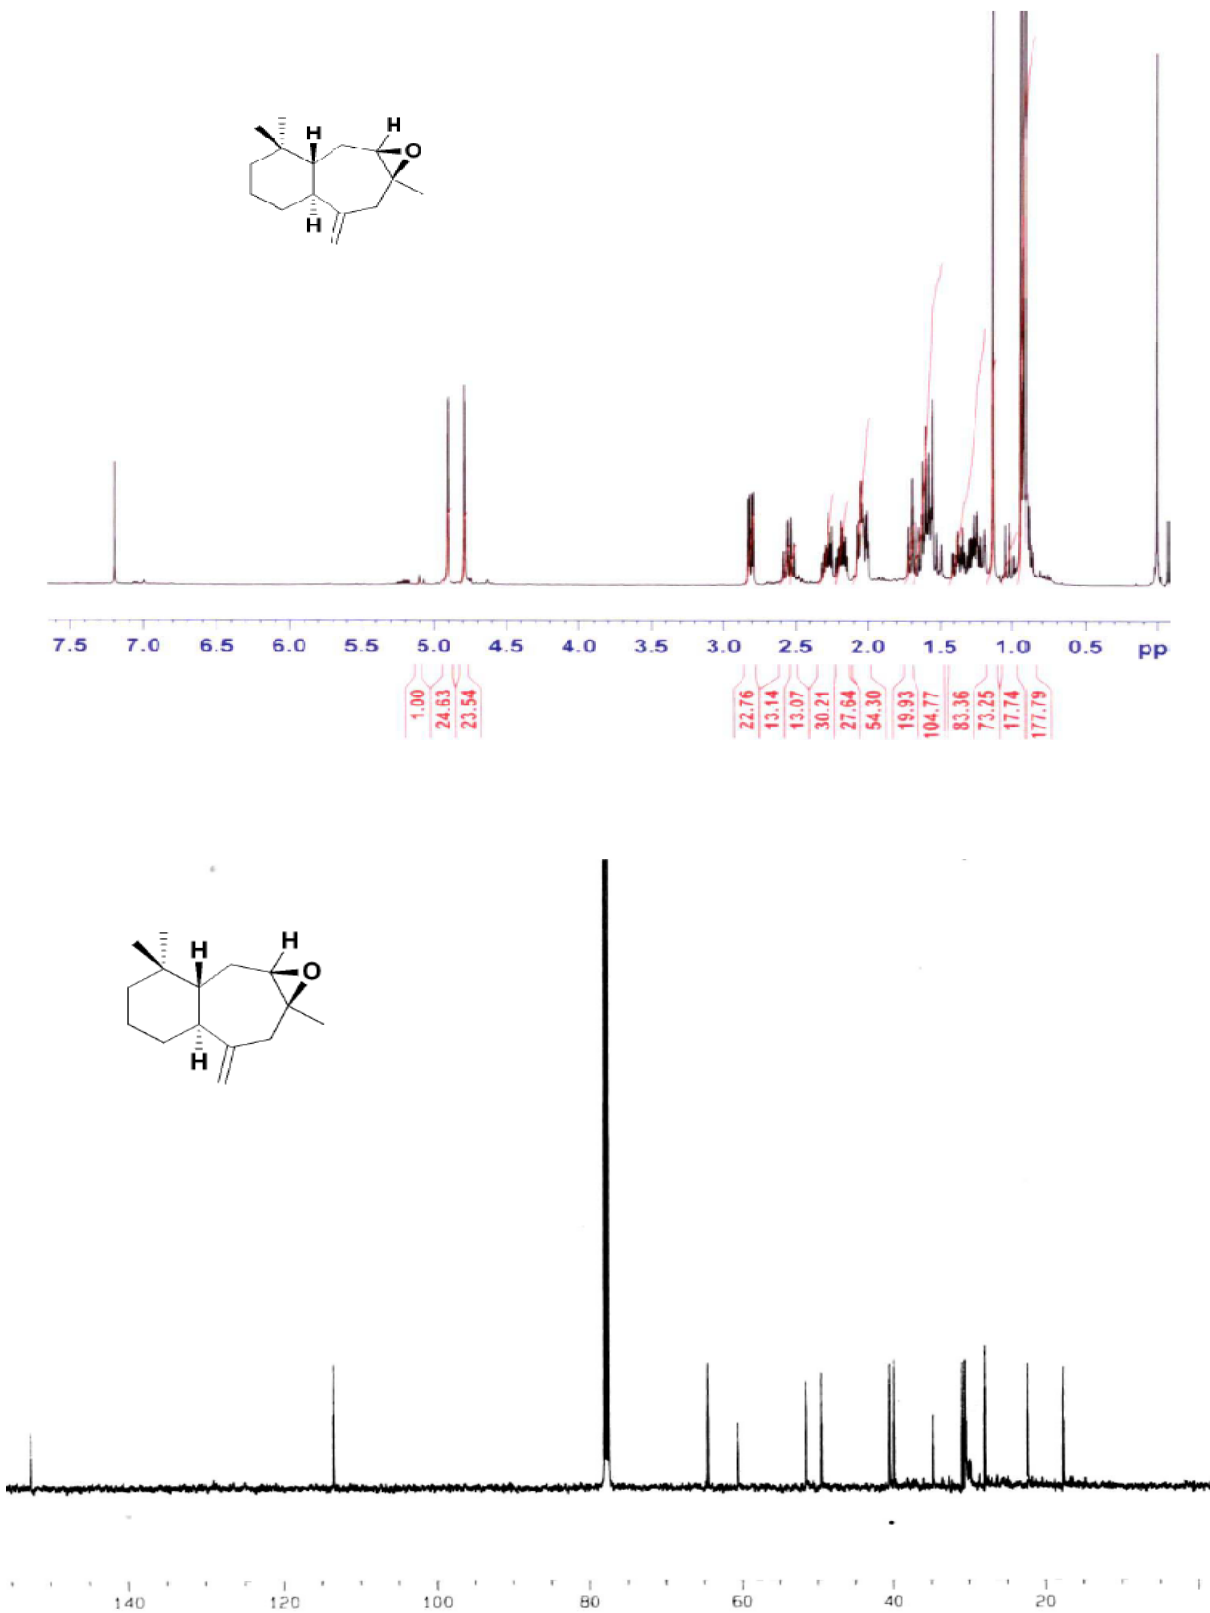

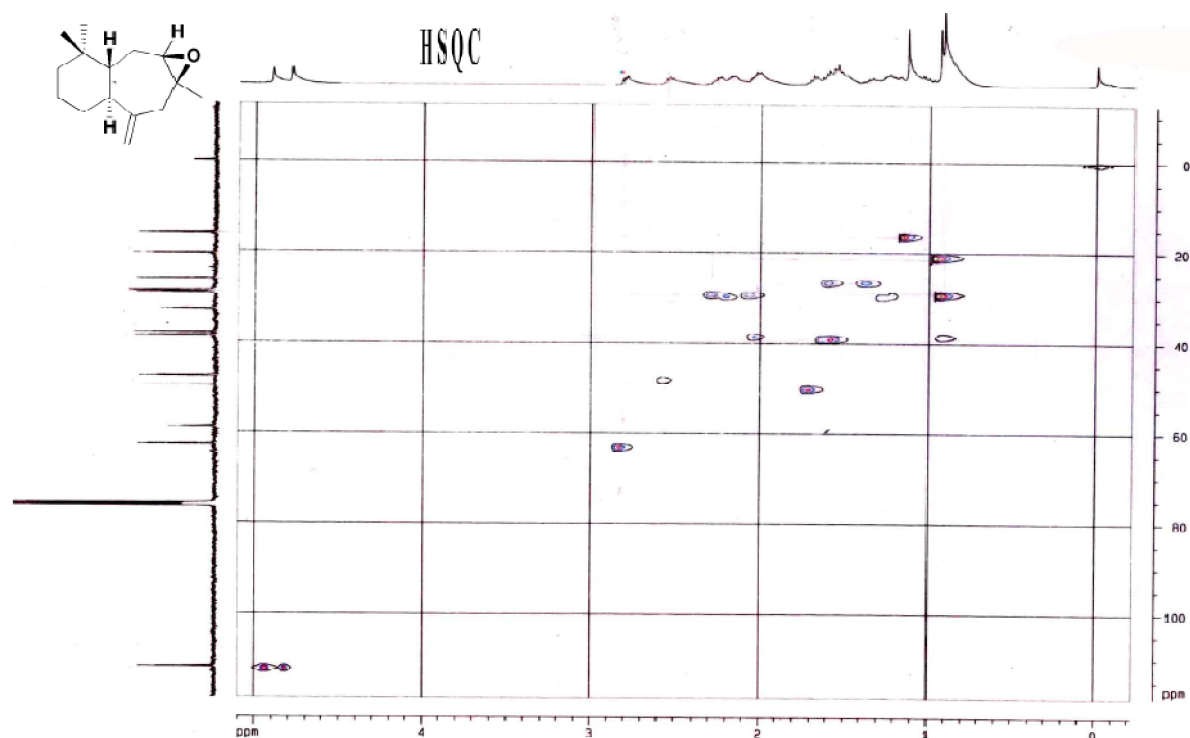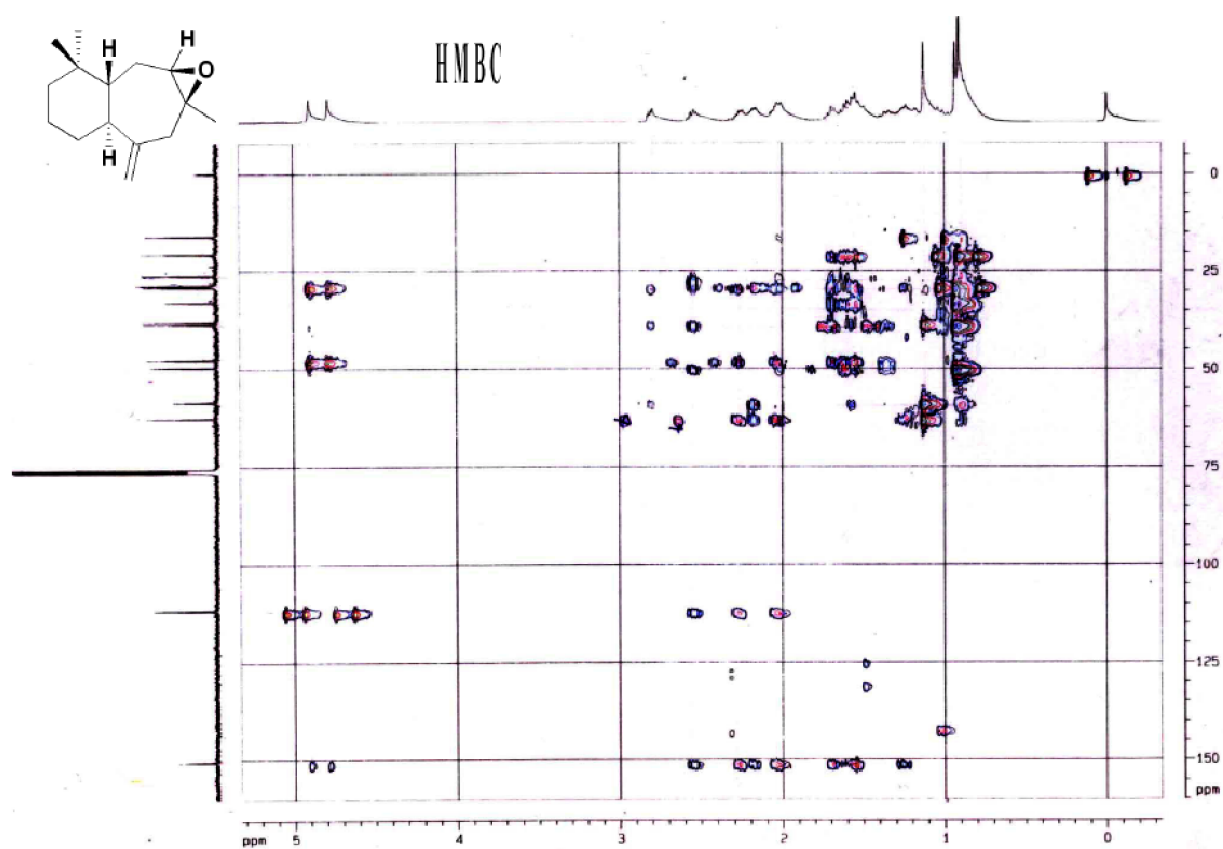

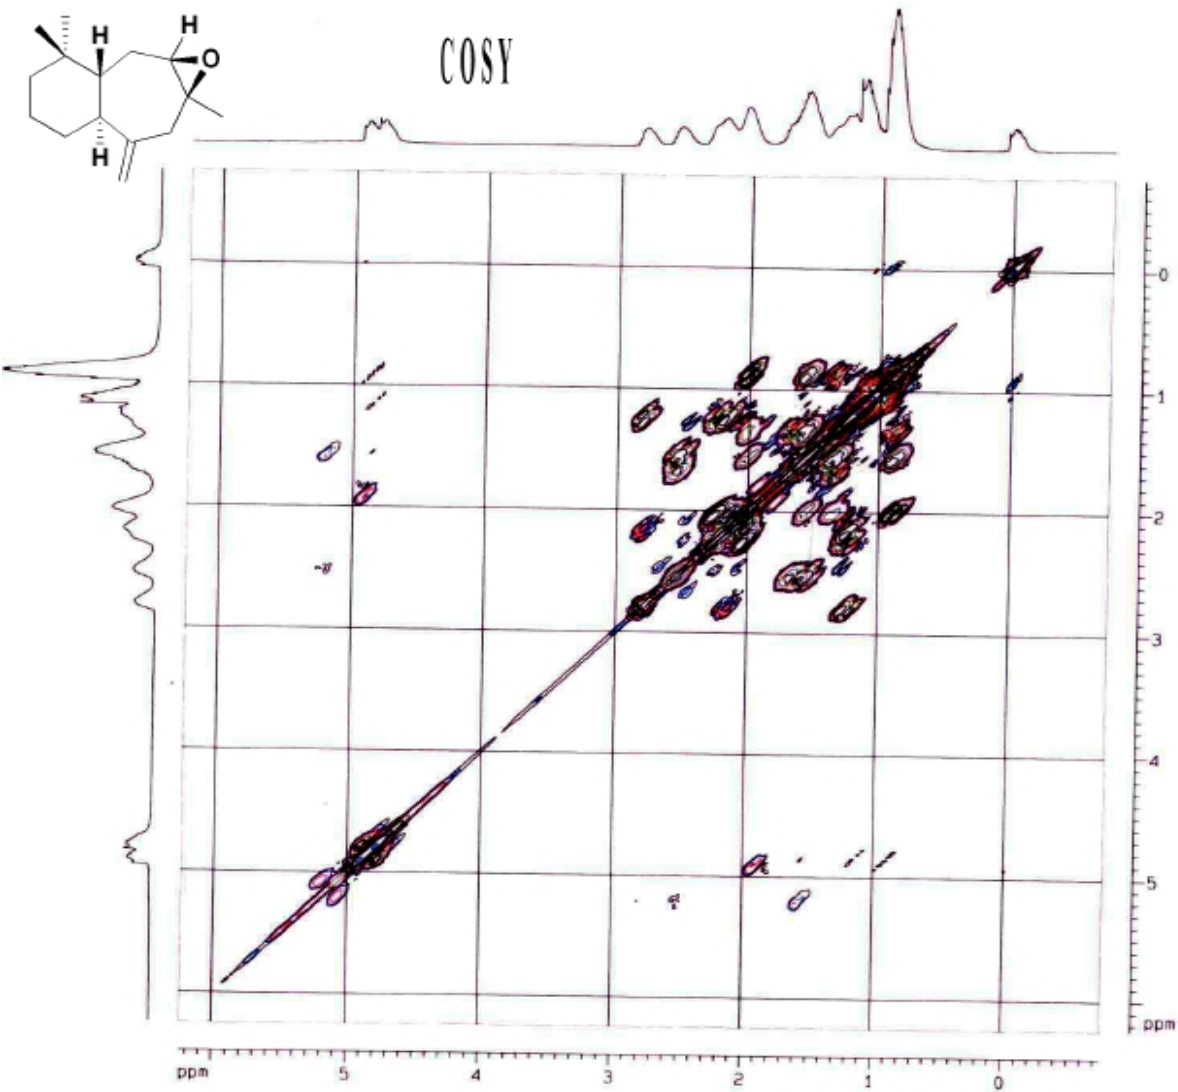

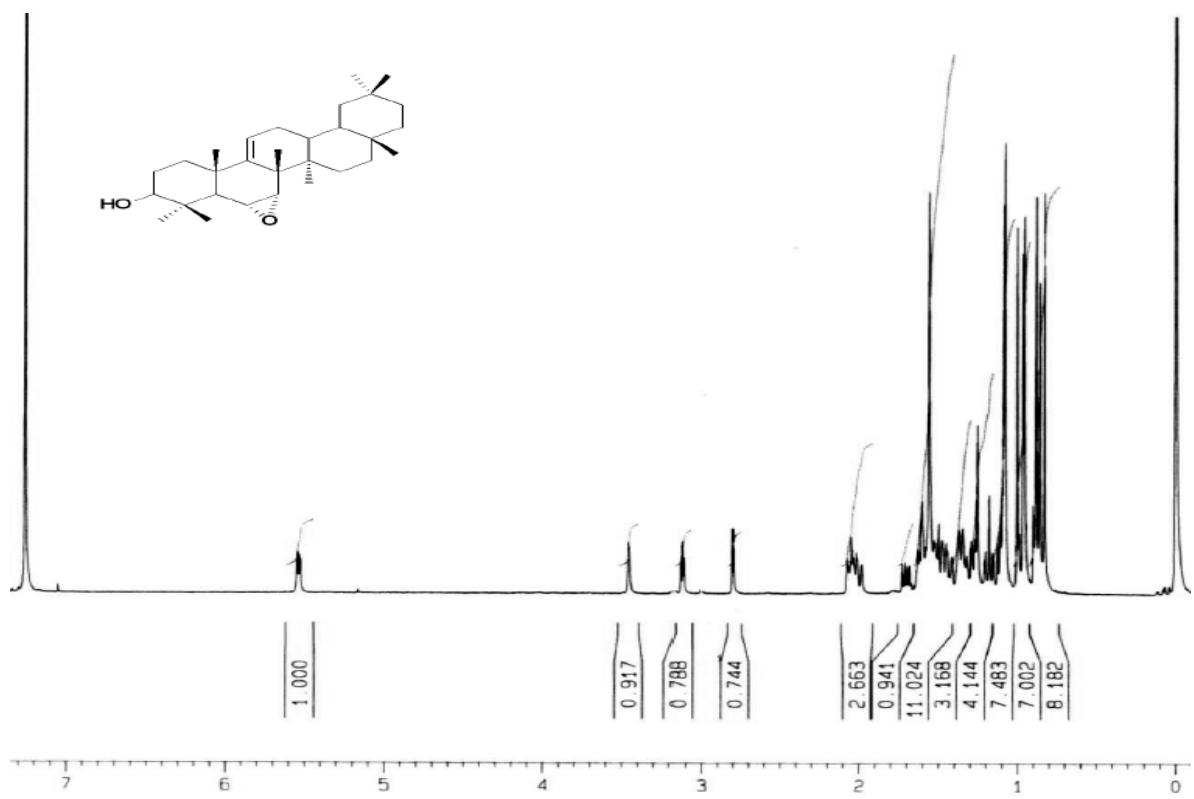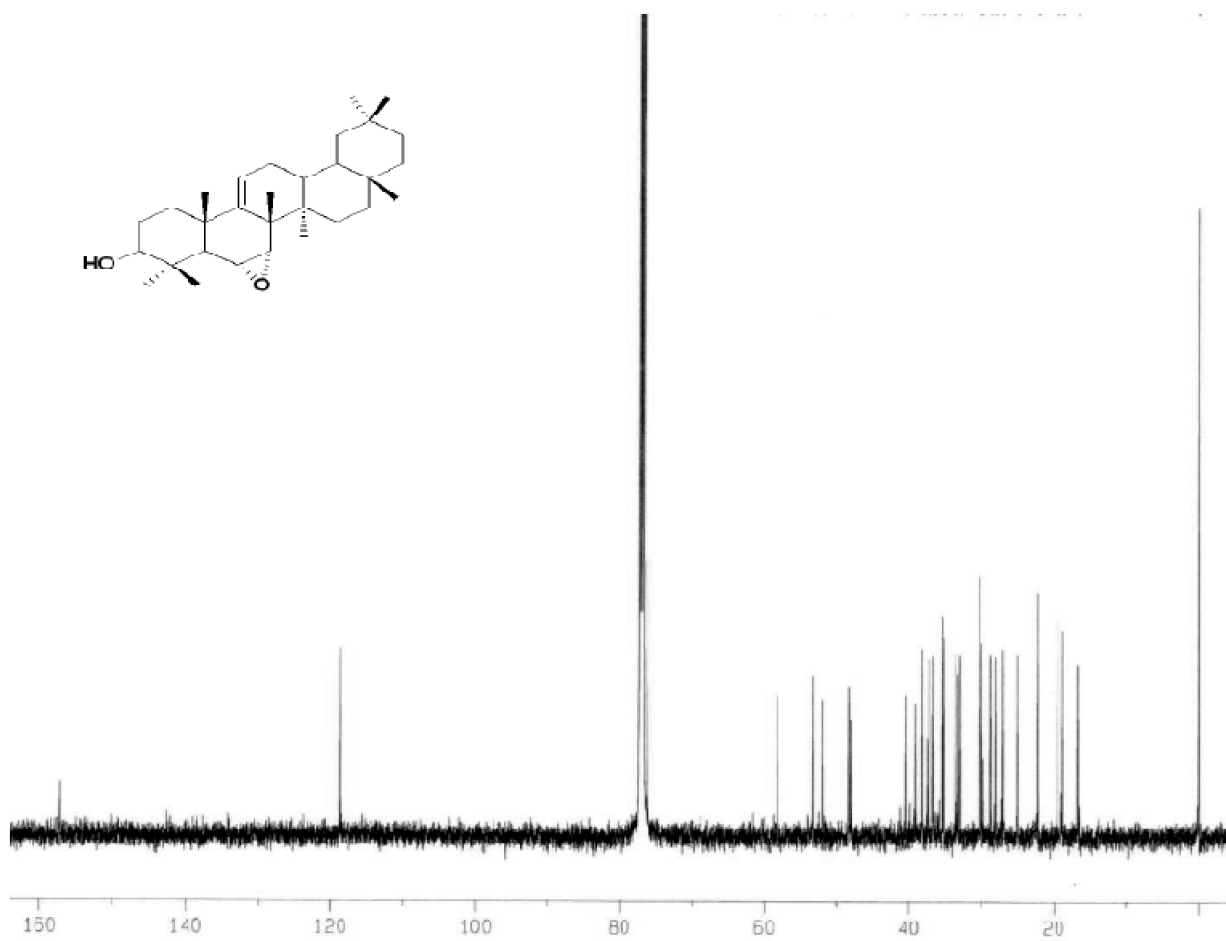

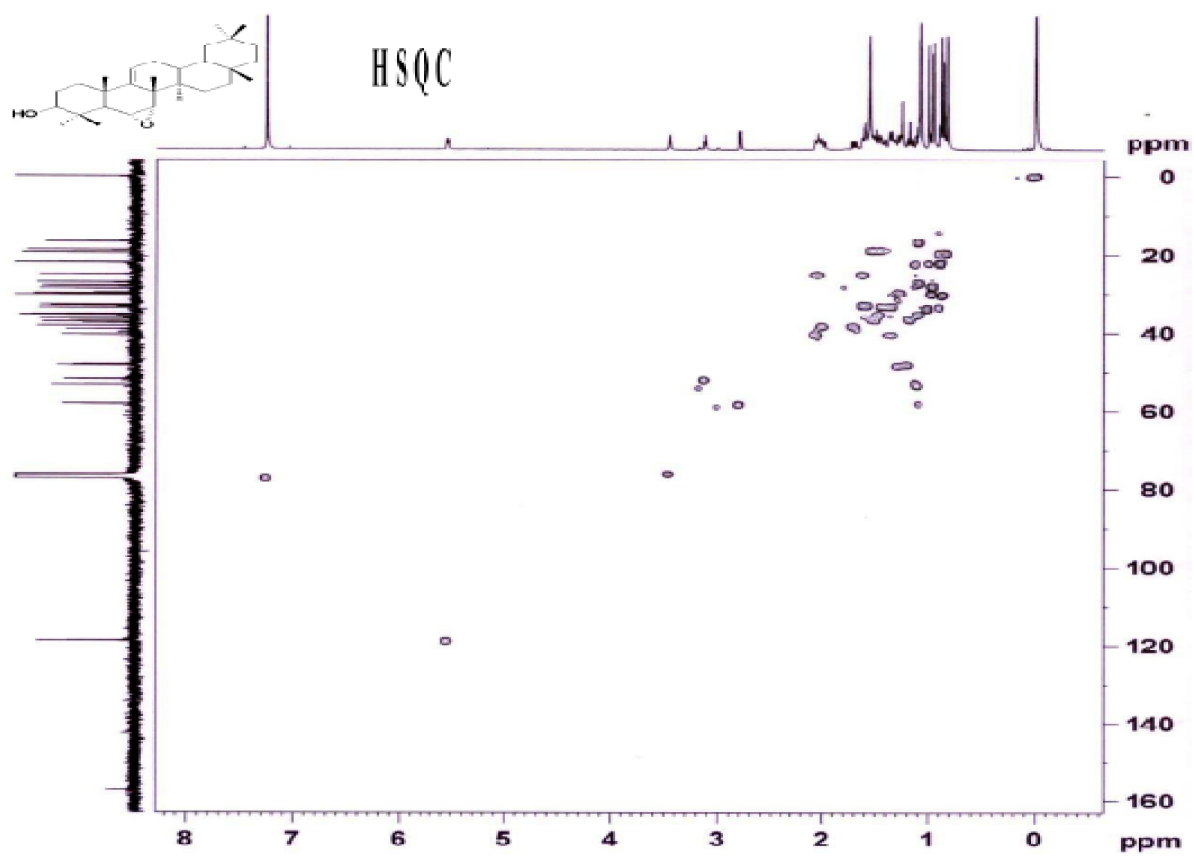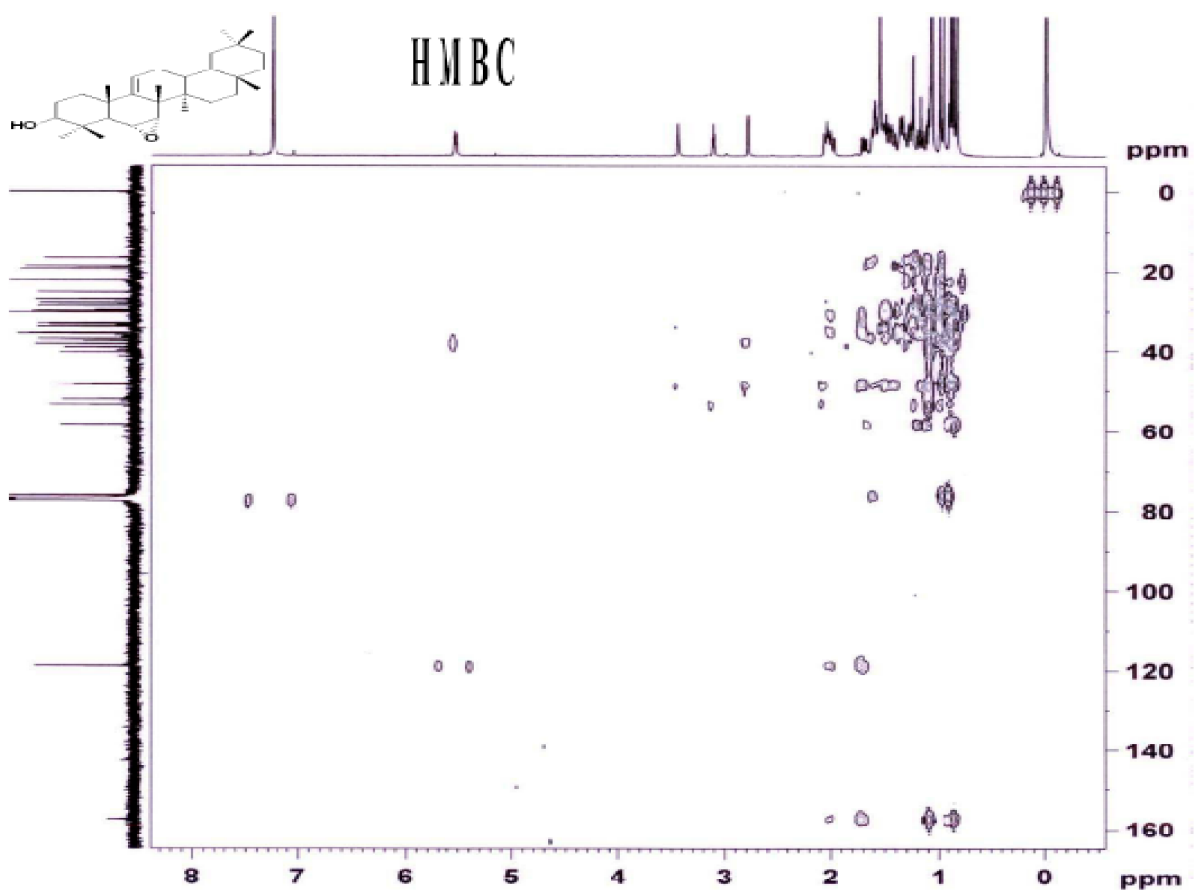



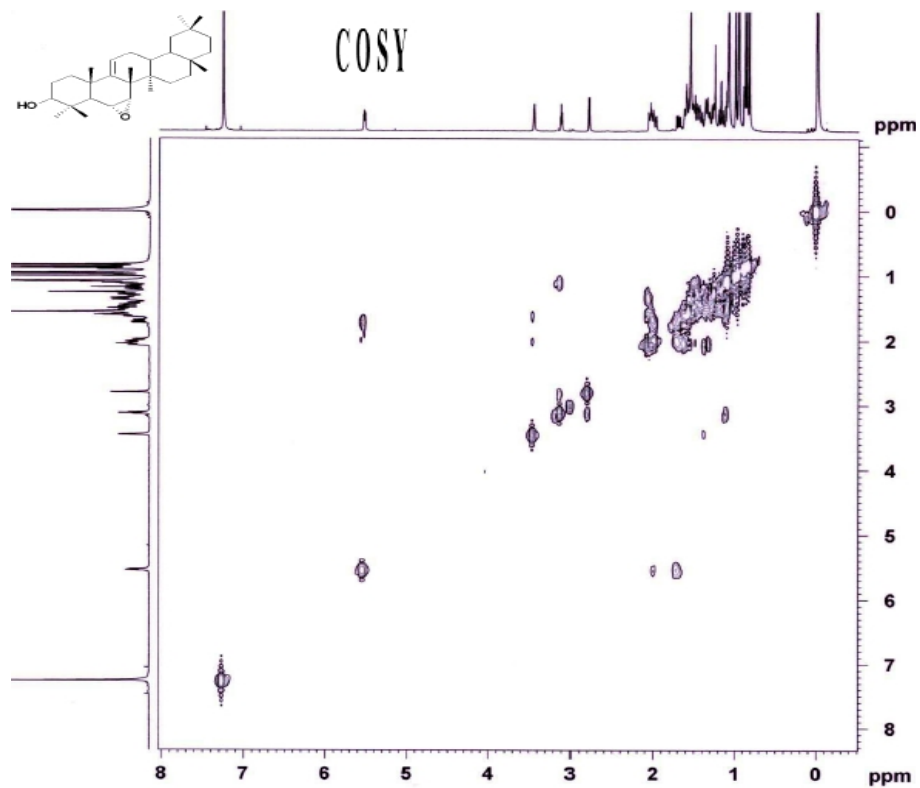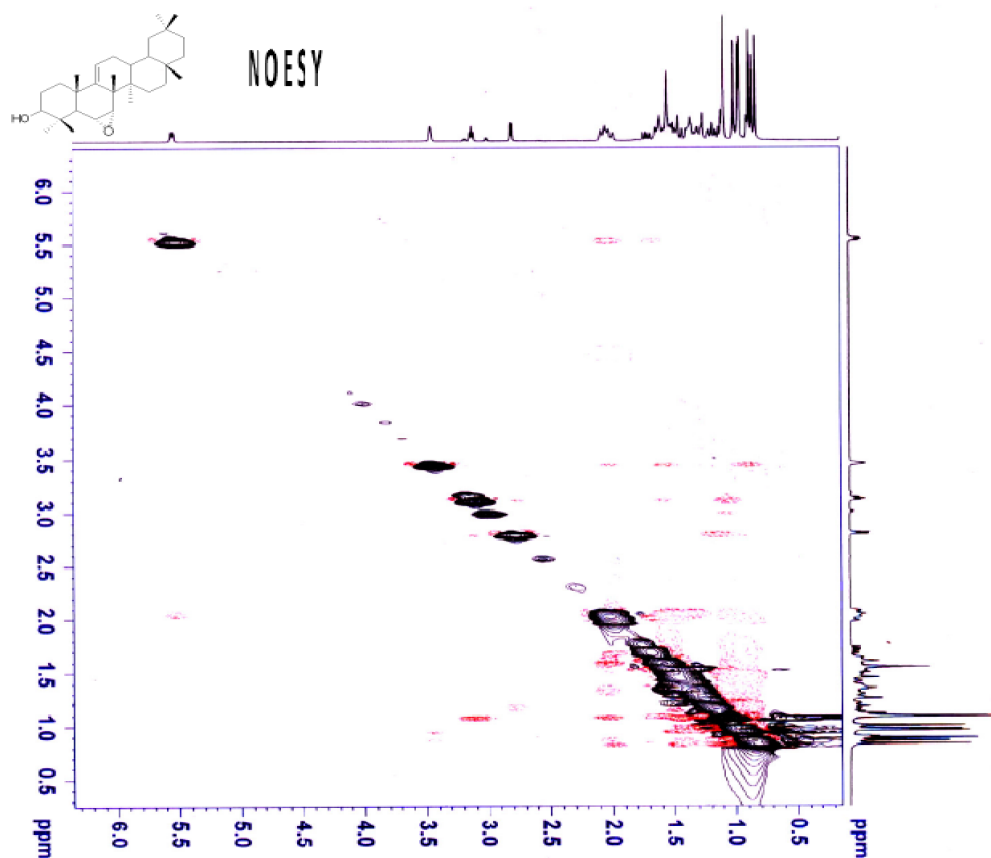

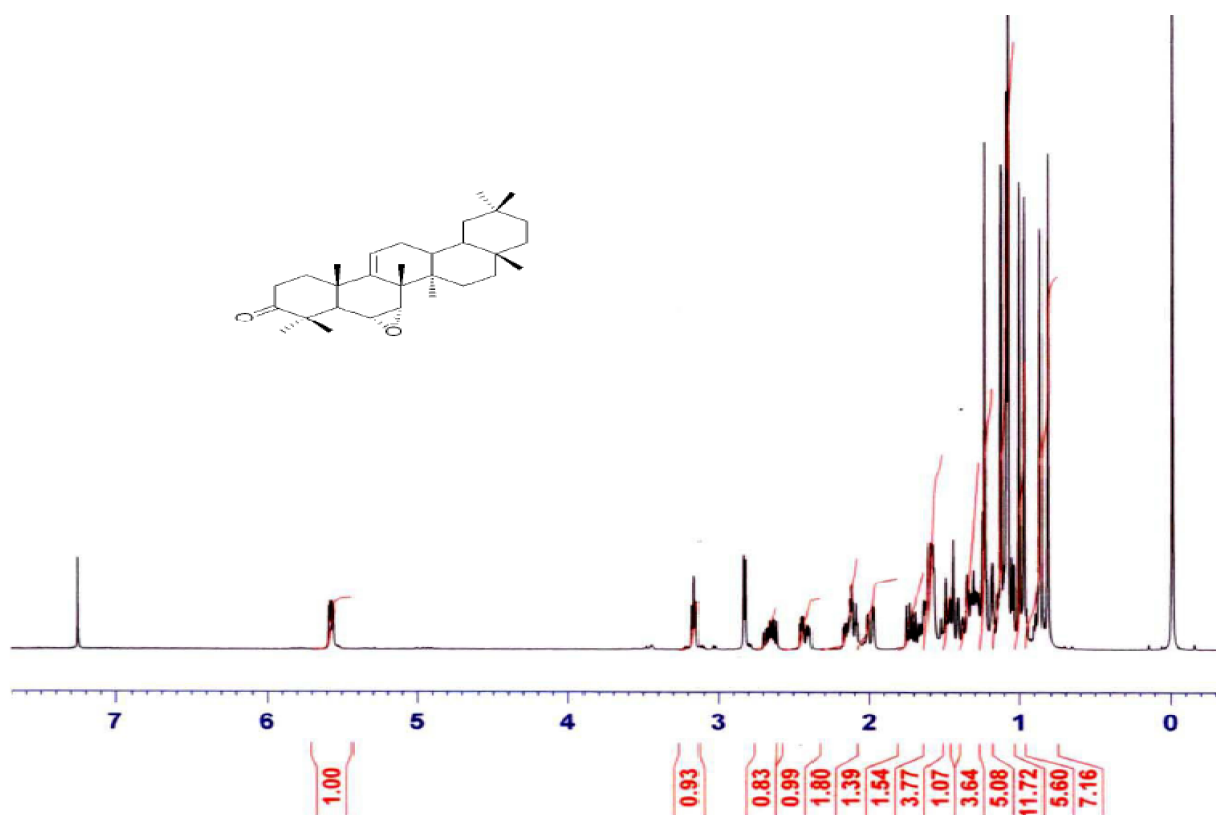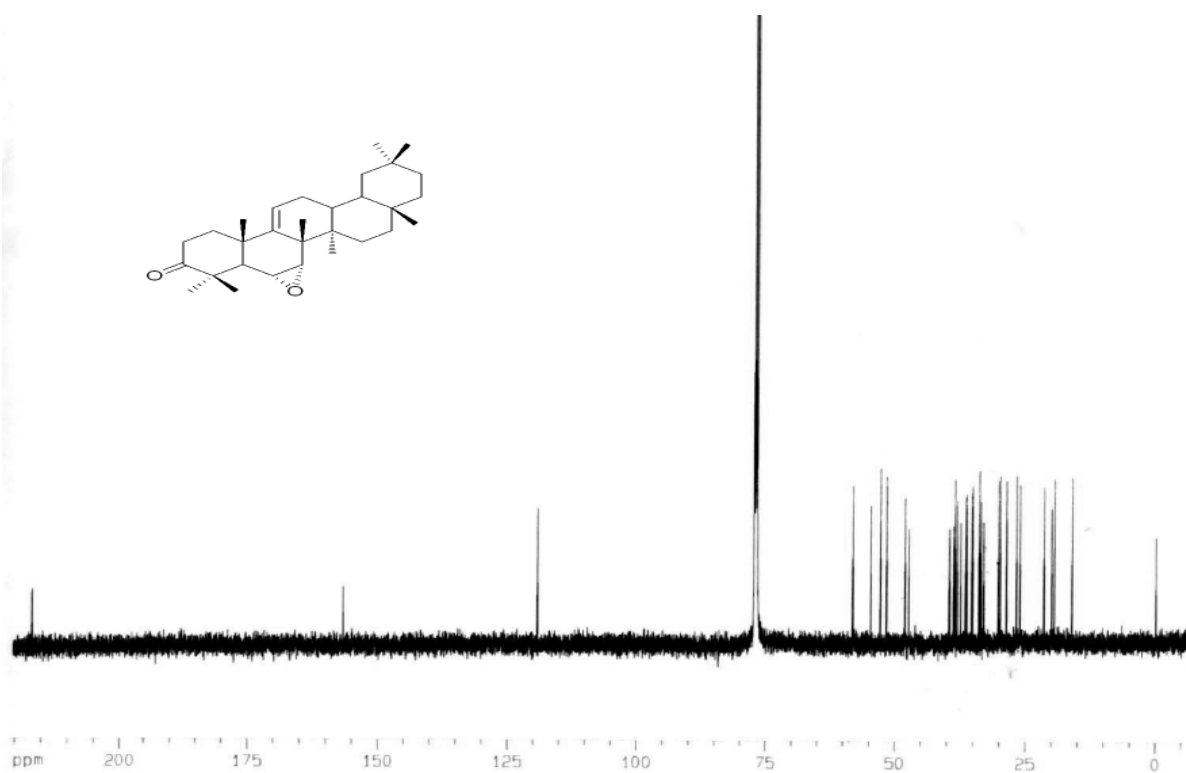

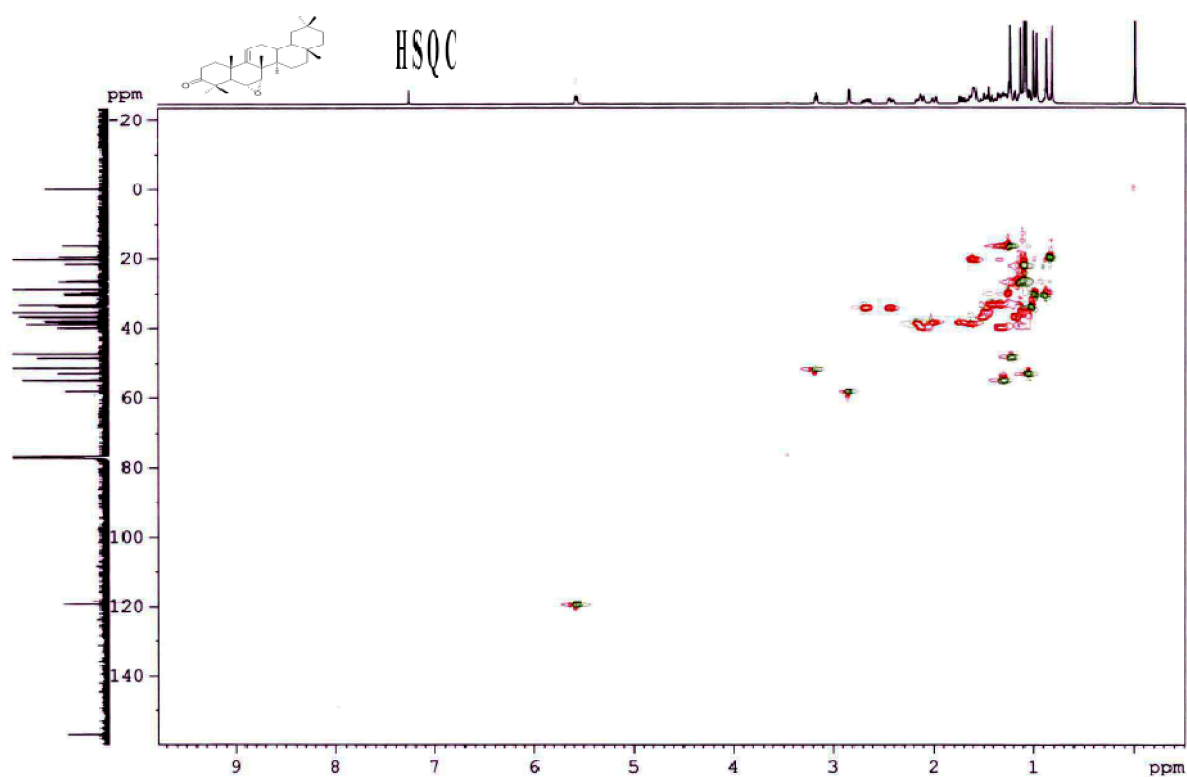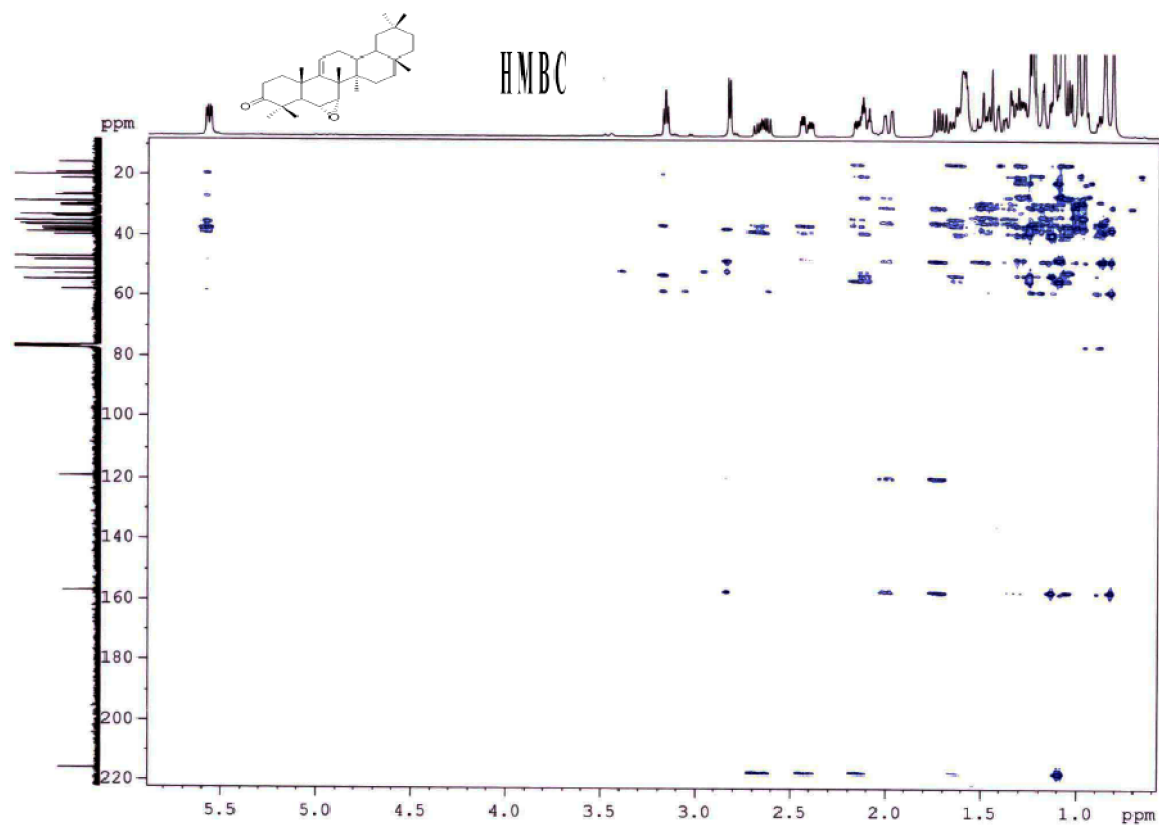

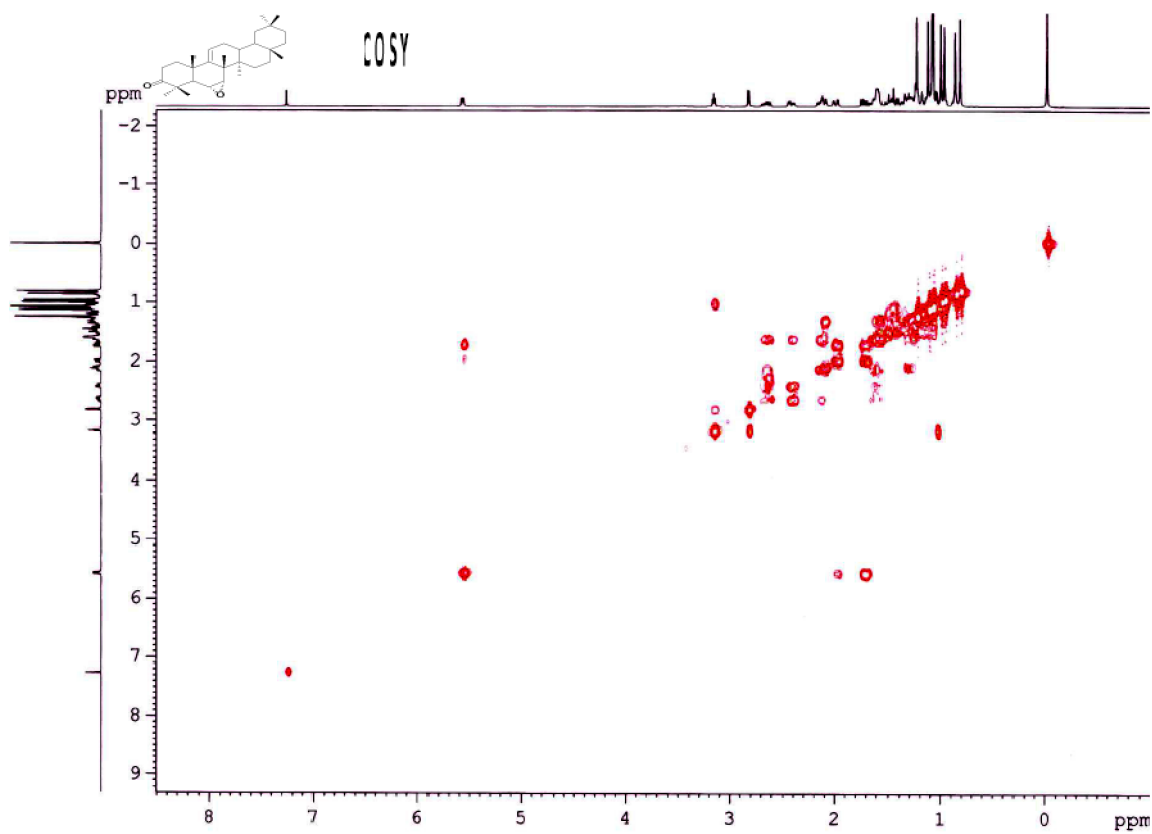

Supplement: c3ra46412a.pdf [file c3ra46412a.pdf]
